# Supplementary material
Source: ML conference proceedings conference paper supplement (https://openreview.net/forum?id=mYG7uEVlQd)
Supplement: supplementary_material [file attachment]

# Supplementary Materials: ZePo: Zero-Shot Portrait Stylization with Faster Sampling

Anonymous Authors

## 1 MORE STYLIZATION RESULTS

Figure 2 displays additional examples of portrait stylization. The experimental results illustrate that our method successfully transfer various styles onto the target face, demonstrating its practical applicability.

## 2 STYLIZATION RESULTS OF NON-PORTRAIT IMAGES

Figure 3 presents the results of applying our method to non-portrait images. Our method can effectively transfer various art styles to different animal images, realizing realistic and high-quality style transfer effects. The experiment results demonstrate the effectiveness of our approach for general style transfer tasks across various styles.

## 3 OTHER BASE MODELS

To demonstrate the effectiveness of our method, we present the results of stylization using different base models in Figure 1, including the latent Consistency Models (LCMs) [1], SD-Turbo [3], and SD-v1.5 [2]. SD-Turbo is a version accelerated by distillation from SD-v2.1 [2]. The experimental results indicate that the undistilled model, SD-v1.5, synthesizes results consistent with our observations in Figure 3, exhibiting issues with blurriness and a lack of high-frequency details. The model accelerated through distillation is capable of extracting more representative features, thereby achieving better stylization results. Although both LCMs and SD-Turbo can synthesize excellent stylized results, we find that LCMs, using consistency loss for distillation, captures higher frequency details better than SD-Turbo, which utilizes Adversarial Diffusion Distillation [3]. This further demonstrates the effectiveness of using LCMs to extract consistency features.

## REFERENCES

- [1] Simian Luo, Yiqin Tan, Longbo Huang, Jian Li, and Hang Zhao. 2023. Latent Consistency Models: Synthesizing High-Resolution Images with Few-Step Inference. *arXiv preprint arXiv:2310.04378* (2023). arXiv:2310.04378
- [2] Robin Rombach, Andreas Blattmann, Dominik Lorenz, Patrick Esser, and Björn Ommer. 2022. High-Resolution Image Synthesis with Latent Diffusion Models. In *CVPR*. 10684–10695.
- [3] Axel Sauer, Dominik Lorenz, Andreas Blattmann, and Robin Rombach. 2023. Adversarial diffusion distillation. *arXiv preprint arXiv:2311.17042* (2023). arXiv:2311.17042

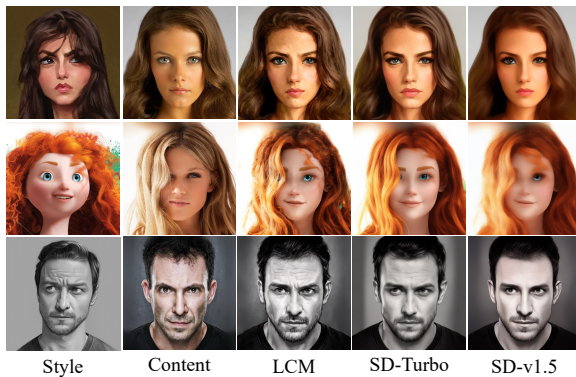

Figure 1: Portrait stylization results with different models.

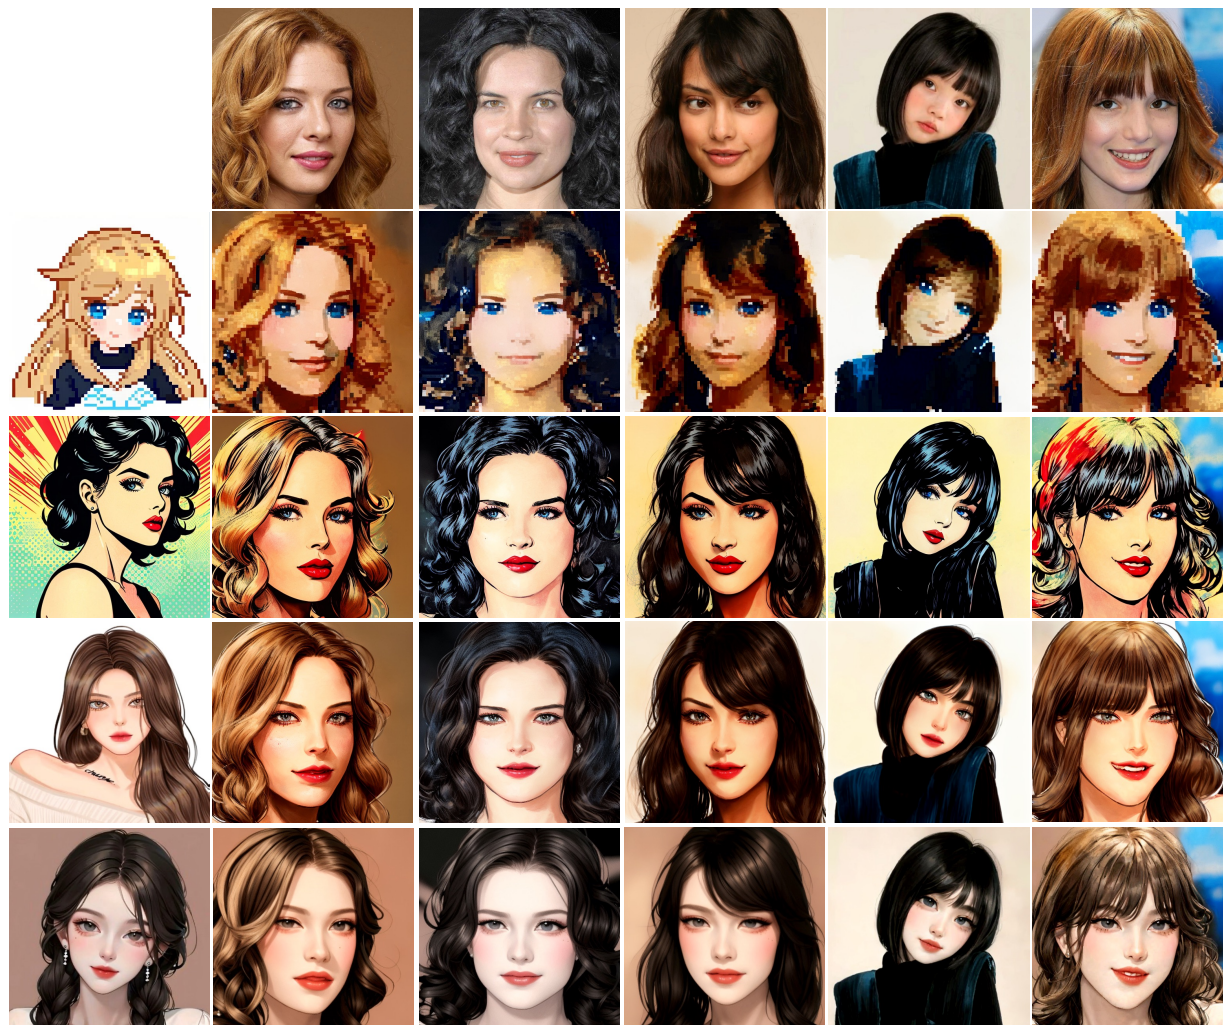

**Figure 2: The results of portrait stylization with various content and reference style images. The first row displays the input content images, while the first column presents the input style images.**



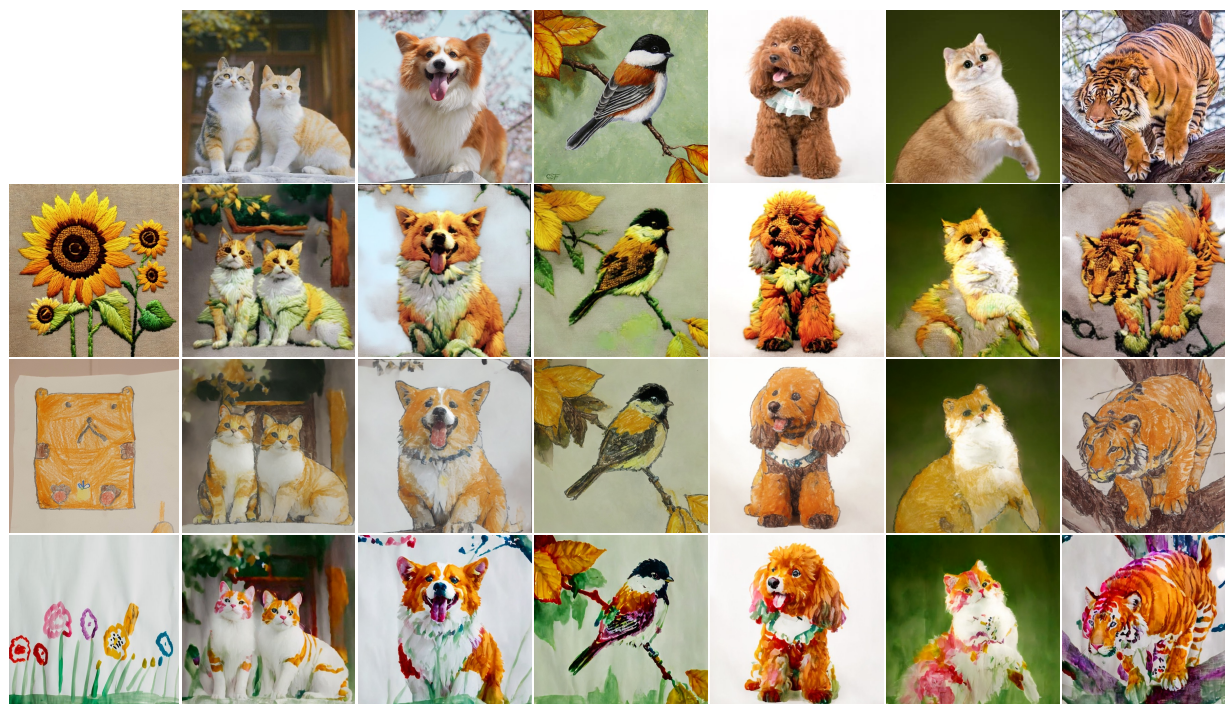

**Figure 3: Stylization results for different subjects (animals). The first row features the input content images, and the first column contains the input style images.**
